# Supplementary material
Source: PubMed Central journal article supplement (PMC4156464)
Supplement: NIHMS58253-supplement-Supplement.pdf [file NIHMS58253-supplement-Supplement.pdf]

## Supplement

### Objects List:

**eMethods:** Further details on the SPEQ measure

**eTable 1:** Information on the participating and non-participating families in the study.

**eTable 2:** Descriptive statistics for psychotic experiences

**eTable 3:** Univariate model fits for whole sample

**eTable 4:** Phenotypic correlations between psychotic experiences

**eTable 5:** Bivariate model fits for whole sample

## Further details on the SPEQ measure

*SPEQ Paranoia* included items adapted from the Paranoia Checklist (43), rated on a 6-point scale: “*Not at all*” (0), “*Rarely*” (1), “*Once a month*” (2), “*Once a week*” (3), “*Several times a week*” (4), “*Daily*” (5) as per the published instrument. *SPEQ Hallucinations* were assessed with items from the Cardiff Anomalous Perceptions Scale (CAPS; 44) using a 6-point scale: “*Not at all*” (0), “*Rarely*” (1), “*Once a Month*” (2), “*Once a Week*” (3), “*Several Times a Week*” (4), “*Daily*” (5) as per the published instrument. *SPEQ Cognitive Disorganisation* was assessed using items from the short version of the Oxford-Liverpool Inventory of Feelings and Experiences (O-LIFE; 45) using “*yes*”(1) “*no*”(0) responses as per the published instrument. *SPEQ Grandiosity* was assessed with items from the “*Myself*” sub-scale of Cognition Checklist for Mania-Revised (CCL-M-R; 46), the Peters et al. Delusions Inventory (PDI; 47), and items developed from clinical case studies. Responses were measured on a 4-point scale: “*Not at all*” (0), “*Somewhat*” (1), “*A great deal*” (2), “*Completely*” (3) as per CCL-M-R (46). *SPEQ Anhedonia* was assessed with items from the anticipatory pleasure subscale of the Temporal Experience of Pleasure Scale (TEPS; 48) using a 6-point scale (rated in terms of Hedonia; the total scale was then reversed): “*Very false for me*” (0), “*Moderately false for me*” (1), “*Slightly false for me*” (2), “*Slightly true for me*” (3), “*Moderately true for me*” (4), “*Very true for me*” (5), as per the original instrument (48). *SPEQ Negative Symptoms* was assessed with items devised from the Scale for the Assessment of Negative Symptoms (SANS; 49). Items tapped into five key areas of the SANS: affective flattening or blunting, alogia, avolition-apathy, anhedonia-asociality, and attention and were rated on a 4-point scale: “*Not at all true*” (0), “*Somewhat true*” (1), “*Mainly true*” (2), “*Definitely true*” (3).

eTable 1. Information on the participating and non-participating families in the study.

|                                                                                                   | Participating |      | Non-participating |      |          |
|---------------------------------------------------------------------------------------------------|---------------|------|-------------------|------|----------|
|                                                                                                   | M             | SD   | M                 | SD   | <i>p</i> |
| Male                                                                                              | 45%           |      | 53%               |      |          |
| Monozygotic                                                                                       | 35%           |      | 32%               |      |          |
| White                                                                                             | 94%           |      | 91%               |      |          |
| Mothers had one or more A-levels (UK advanced educational qualification) as highest qualification | 16%           |      | 12%               |      |          |
| SDQ Total scale, age 4 years                                                                      | 8.54          | 4.44 | 9.41              | 4.70 | <.001    |
| SDQ Emotional problems subscale, age 4 years                                                      | 1.33          | 1.41 | 1.46              | 1.50 | <.001    |
| SDQ Total scale, age 12 years                                                                     | 6.80          | 5.03 | 7.91              | 5.44 | <.001    |
| SDQ Emotional problems subscale, age 12 years                                                     | 1.81          | 1.91 | 1.93              | 2.03 | <.05     |

Note. SDQ, Strengths and Difficulties Questionnaire.

eTable 2. Descriptive statistics for psychotic experiences

|                           | Males<br>Mean (SD) | Females<br>Mean (SD) | MZ<br>Mean (SD) | DZ<br>Mean (SD) | Sex | Zyg | ANOVA<br>Sex*Zyg | R <sup>2</sup> | N    |
|---------------------------|--------------------|----------------------|-----------------|-----------------|-----|-----|------------------|----------------|------|
| Paranoia                  | 11.76 (10.42)      | 12.45 (10.71)        | 11.79 (10.45)   | 12.33 (10.65)   | .01 | .05 | .27              | .00            | 4731 |
| Hallucinations            | 4.29 (5.77)        | 4.89 (6.07)          | 4.45 (5.92)     | 4.71 (5.96)     | .00 | .11 | .99              | .00            | 4739 |
| Cognitive disorganization | 3.40 (2.73)        | 4.39 (2.87)          | 3.86 (2.83)     | 4.00 (2.86)     | .00 | .02 | .68              | .03            | 4732 |
| Grandiosity               | 5.83 (4.56)        | 4.40 (4.25)          | 5.25 (4.34)     | 5.34 (4.45)     | .00 | .00 | .73              | .01            | 4735 |
| Anhedonia                 | 18.53 (7.99)       | 14.60 (7.43)         | 16.10 (7.95)    | 16.50 (7.91)    | .00 | .47 | .82              | .06            | 4735 |
| Negative symptoms         | 3.18 (4.10)        | 2.52 (3.69)          | 2.64 (3.58)     | 2.91 (4.06)     | .00 | .02 | .02              | .01            | 4746 |

Note. Means and standard deviations presented prior to transformation. MZ=Monozygotic twins; DZ=Dyzygotic twins; Zyg=zygosity. Sex\*Zyg = p-value associated with the effects of the interaction between sex and zygosity on the means; R<sup>2</sup> = proportion of the total variance explained by sex and zygosity; N= number of 1 randomly selected individual from each twin pair. Mean sex differences were previously described in Ronald et al (in press).

eTable 3 Univariate model fits for whole sample

| Model                     | -2ll            | df          | $\chi^2$      | $\Delta$ df | p            | AIC            |
|---------------------------|-----------------|-------------|---------------|-------------|--------------|----------------|
| Paranoia                  |                 |             |               |             |              |                |
| 1. Saturated              | 32404.65        | 9438        | -             | -           | -            | -              |
| 2. ACE SD                 | 32418.21        | 9451        | 13.559        | 13          | 0.406        | -12.44         |
| 3. ACE qual               | 32418.95        | 9452        | 14.300        | 14          | 0.428        | -13.700        |
| <b>4. ACE sc</b>          | <b>32423.72</b> | <b>9454</b> | <b>19.102</b> | <b>16</b>   | <b>0.263</b> | <b>-12.898</b> |
| 5. ACE no effects         | 32439.65        | 9455        | 35            | 17          | 0.006        | 1              |
| Hallucinations            |                 |             |               |             |              |                |
| 1. Saturated              | 30131.80        | 9448        | -             | -           | -            | -              |
| 2. ACE SD                 | 30138.14        | 9461        | 6.339         | 13          | 0.933        | -19.661        |
| <b>3. ACE qual</b>        | <b>30140.51</b> | <b>9462</b> | <b>8.714</b>  | <b>14</b>   | <b>0.849</b> | <b>-19.286</b> |
| 4. ACE sc                 | 30156.98        | 9464        | 25.184        | 16          | 0.067        | -6.816         |
| 5. ACE no effects         | 30243.95        | 9465        | 112.156       | 17          | 0.000        | 78.156         |
| Cognitive Disorganisation |                 |             |               |             |              |                |
| 1. Saturated              | 18359.35        | 9438        | -             | -           | -            | -              |
| 2. ACE SD                 | 18377.41        | 9451        | 18.053        | 13          | 0.156        | -7.947         |
| 3. ACE qual               | 18377.41        | 9452        | 18.053        | 14          | 0.204        | -9.947         |
| <b>4. ACE sc</b>          | <b>18383.94</b> | <b>9454</b> | <b>24.587</b> | <b>16</b>   | <b>0.077</b> | <b>-7.413</b>  |
| 5. ACE no effects         | 18468.62        | 9455        | 109.623       | 17          | 0.000        | 75.263         |
| Grandiosity               |                 |             |               |             |              |                |
| 1. Saturated              | 22070.85        | 9440        | -             | -           | -            | -              |
| 2. ACE SD                 | 22086.91        | 9453        | 16.065        | 13          | 0.246        | -9.935         |
| 3. ACE qual               | 22086.91        | 9454        | 16.065        | 14          | 0.310        | -11.939        |
| <b>4. ACE sc</b>          | <b>22092.06</b> | <b>9456</b> | <b>21.21</b>  | <b>16</b>   | <b>0.171</b> | <b>-10.79</b>  |
| 5. ACE no effects         | 22189.31        | 9457        | 118.46        | 17          | 0.000        | 84.457         |
| Anhedonia                 |                 |             |               |             |              |                |
| 1. Saturated              | 64719.40        | 9443        | -             | -           | -            | -              |
| 2. ACE SD                 | 94729.22        | 9456        | 9.642         | 13          | 0.723        | -16.36         |
| 3. ACE qual               | 64729.22        | 9457        | 0             | 14          | 0.775        | -18.17         |
| <b>4. ACE sc</b>          | <b>64734.44</b> | <b>9459</b> | <b>15.044</b> | <b>16</b>   | <b>0.521</b> | <b>-16.96</b>  |
| 5. ACE no effects         | 64753.13        | 9460        | 33.730        | 17          | 0.009        | -0.270         |
| Negative symptoms         |                 |             |               |             |              |                |
| 1. Saturated              | 20554.86        | 9418        | -             | -           | -            | -              |
| 2. ACE SD                 | 20569.24        | 9431        | 14.38         | 13          | 0.348        | -11.62         |
| 3. ACE qual               | 20570.88        | 9432        | 16.01         | 14          | 0.313        | -11.99         |
| <b>4. ACE sc</b>          | <b>20576.36</b> | <b>9434</b> | <b>21.50</b>  | <b>16</b>   | <b>0.160</b> | <b>-10.50</b>  |
| 5. ACE no effects         | 21004.71        | 9435        | 449.847       | 17          | 0.000        | 415.84         |

Note. Models were fitted using raw data maximum likelihood Best fittings model shown in bold and selected using the  $\chi^2$  difference and AIC. The fit statistics provided by Mx for raw data modelling are minus twice the log likelihood (-2LL) of the observations. This is not an overall measure of fit, but provides a relative measure of fit, since differences in -2LL between models are distributed as  $\chi^2$ . Therefore, to examine the overall fit of the genetic model, it is necessary to compare the -2LL to that of a saturated model. If the difference in  $\chi^2$  is non-significant the model is said to have a good fit. Lower AIC values reflect a better fit, a difference in AIC between

two models of 2 or less, suggests evidence for both models (the most parsimonious model should be chosen), a difference of 3 indicates that the lower AIC model has more support and a difference of more than 10, indicates that the lower AIC model is a better fit compared to the higher AIC model (50). For example, although models 2, 3 and 4 provided a good description of the data for Paranoia (chi-square difference non-significant compared to saturated model) AIC estimates were very similar (within 2 of each other) thus model 4 was selected in line with rules of parsimony. -2LL = negative 2 log likelihood; df = degrees of freedom;  $X^2$  = likelihood ratio  $X^2$  test comparing the -2LL fit of each model to the -2LL fit of the saturated model;  $\Delta$ df = difference in degrees of freedom comparing each model to the saturated model; AIC = Akaike's Information Criterion); p = *p*-value. ACE SD: genetic and environmental influences specified separately for males and females, qualitative differences also estimated by allowing either rA or rC to vary for DZ opposite-sex twins. ACE Qual: genetic and environmental influences specified separately for males and females, rA or rC not allowed to vary for DZ opposite-sex twins. ACE sc: ACE estimates equated across sex but not variances. ACE no effects: ACE estimates and variances equated across sex.

eTable 4: Phenotypic correlations between psychotic experiences

|                              | Paranoia        | Hallucinations  | Cognitive<br>Disorganization | Grandiosity       | Anhedonia       |
|------------------------------|-----------------|-----------------|------------------------------|-------------------|-----------------|
| Hallucinations               | .45 (.43-.48)** |                 |                              |                   |                 |
| Cognitive<br>Disorganization | .40 (.38-.43)** | .41 (.38-.43)** |                              |                   |                 |
| Grandiosity                  | .10 (.07-.12)** | .20 (.17-.22)** | .01 (-.02-.03)               |                   |                 |
| Anhedonia                    | .08 (.05-.11)** | .02 (-.01-.05)  | .03 (-.01-.06)               | -.16 (-.19-.13)** |                 |
| Negative symptoms            | .16 (.13-.19)** | .14 (.11-.16)** | .23 (.21-.26)**              | -.01 (-.04-.02)   | .14 (.11-.17)** |

Note. Pearson correlations presented prior to transformation and age and sex regression. Correlations between subscales were previously described in Ronald et al (in press)

\*\*p<.01

eTable 5: Bivariate model fits for whole sample

| Model                                       | -2ll            | df           | $\chi^2$    | $\Delta$ df | p          |
|---------------------------------------------|-----------------|--------------|-------------|-------------|------------|
| Cognitive disorganization-Negative symptoms |                 |              |             |             |            |
| 1. Saturated                                | 38361.43        | 18836        | -           | -           | -          |
| <b>2. ACE</b>                               | <b>38712.65</b> | <b>18890</b> | -           | -           | -          |
| 3. AE                                       | 38783.64        | 18893        | 70.99       | 3           | .00        |
| 4. CE                                       | 39261.91        | 18893        | 549.61      | 3           | .00        |
| 5. E                                        | 42104.64        | 18896        | 3391.988    | 6           | .00        |
| Cognitive disorganization-Hallucinations    |                 |              |             |             |            |
| 1. Saturated                                | 46578.63        | 18866        | -           | -           | -          |
| 2. ACE                                      | 46783.29        | 18920        | -           | -           | -          |
| <b>3. AE</b>                                | <b>46791.25</b> | <b>18923</b> | <b>7.96</b> | <b>3</b>    | <b>.05</b> |
| 4. CE                                       | 46903.16        | 18923        | 119.87      | 3           | .00        |
| 5. E                                        | 47773.25        | 18926        | 989.96      | 6           | .00        |
| Cognitive disorganization-Paranoia          |                 |              |             |             |            |
| 1. Saturated                                | 49067.47        | 18856        | -           | -           | -          |
| 2. ACE                                      | 49188.56        | 18910        | -           | -           | -          |
| <b>3. AE</b>                                | <b>49189.82</b> | <b>18913</b> | <b>1.26</b> | <b>3</b>    | <b>.74</b> |
| 4. CE                                       | 46364.99        | 18913        | 176.43      | 3           | .00        |
| 5. E                                        | 50337.80        | 18916        | 1149.24     | 6           | .00        |
| Paranoia-Hallucinations                     |                 |              |             |             |            |
| 1. Saturated                                | 60311.74        | 18866        | -           | -           | -          |
| 2. ACE                                      | 60471.69        | 18920        | -           | -           | -          |
| <b>3. AE</b>                                | <b>60475.86</b> | <b>18923</b> | <b>4.17</b> | <b>3</b>    | <b>.24</b> |
| 4. CE                                       | 60627.66        | 18923        | 155.97      | 3           | .00        |
| 5. E                                        | 61635.30        | 18926        | 1163.61     | 6           | .00        |

Note: Best fittings model shown in bold. -2LL = negative 2 log likelihood; df = degrees of freedom;  $\chi^2$  = likelihood ratio  $\chi^2$  test comparing the -2LL fit of each model to the -2LL fit of the saturated model;  $\Delta$ df = difference in degrees of freedom comparing each model to the saturated model; p = p-value.
